# Supplementary material for: Discovery of Metal Ions Chelator Quercetin Derivatives with Potent Anti-HCV Activities
Source: MDPI journal article supplement (doi:10.3390/molecules20046978), 2015-04-16
Supplement: s1 [file s1]

## Supplementary Data

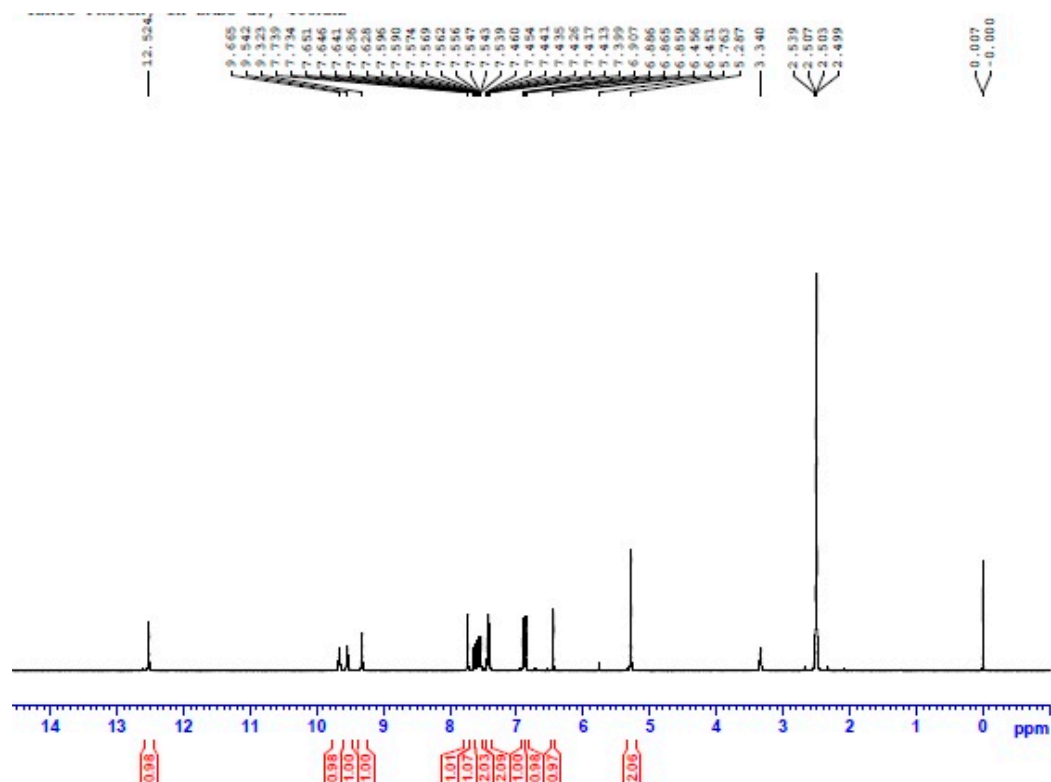

Figure S1. <sup>1</sup>H-NMR spectrum of **3c** (DMSO-*d*<sub>6</sub>).

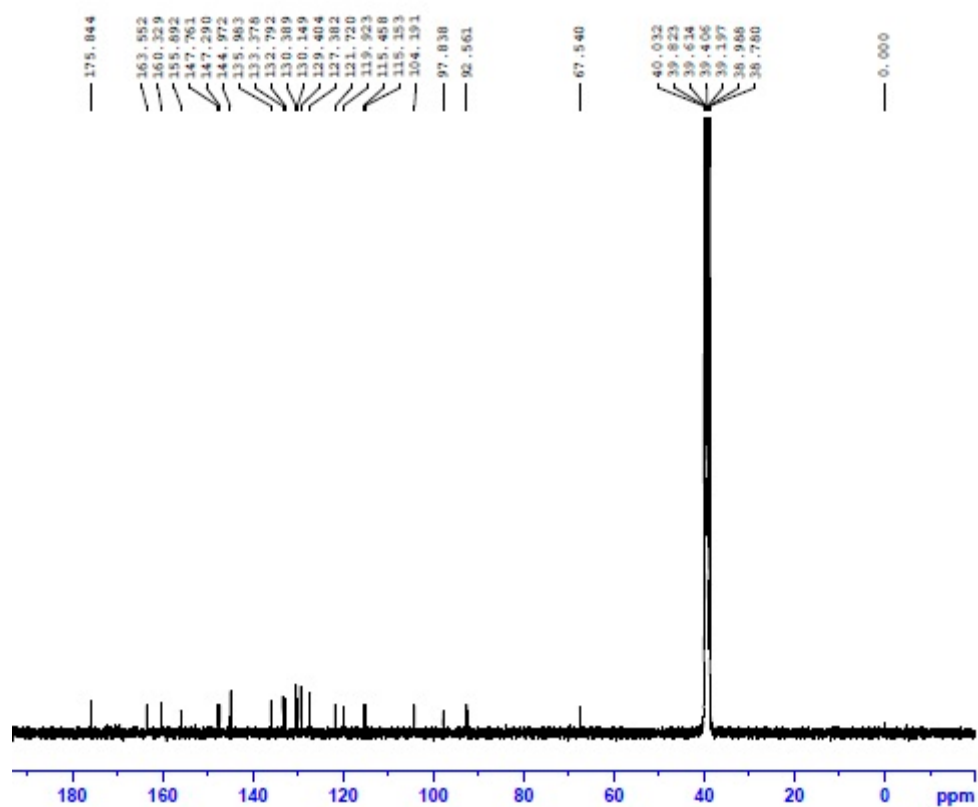

Figure S2. <sup>13</sup>C-NMR spectrum of **3c** (DMSO-*d*<sub>6</sub>).

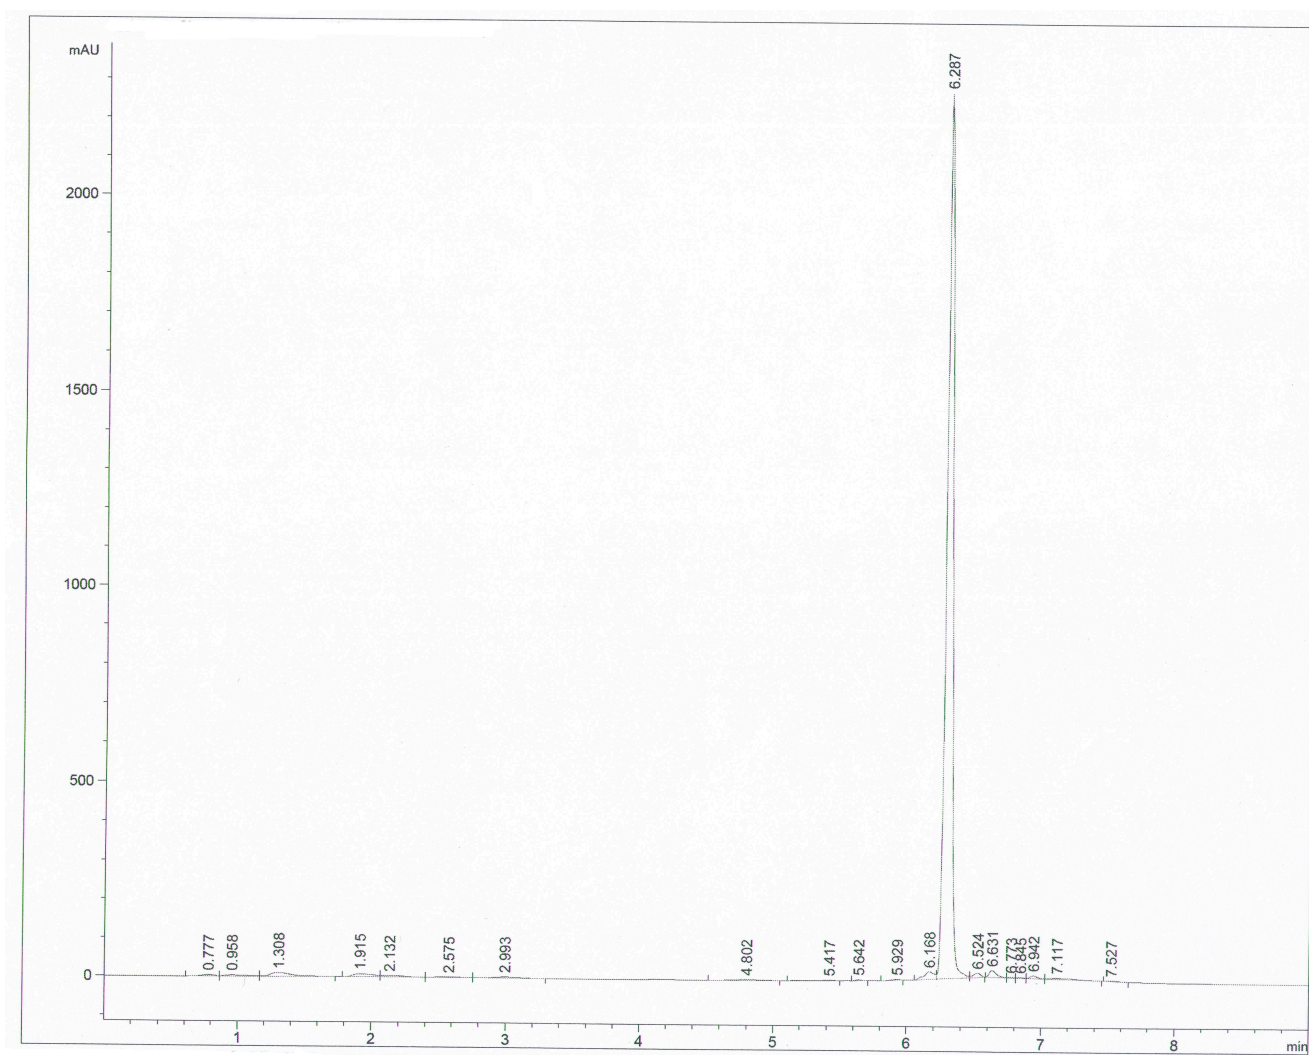

**Figure S3.** HPLC analysis of **3c**. Compound **3c** was analyzed by Agilent Technologies HPLC system and C18 reversed-phase HPLC column. Mobile phase consisted of a solvent mixture of methanol: 0.1% formic acid in the ratio 60:40 (v/v). The flow rate and test wavelength were 0.250 mL/min and 254 nm, respectively.

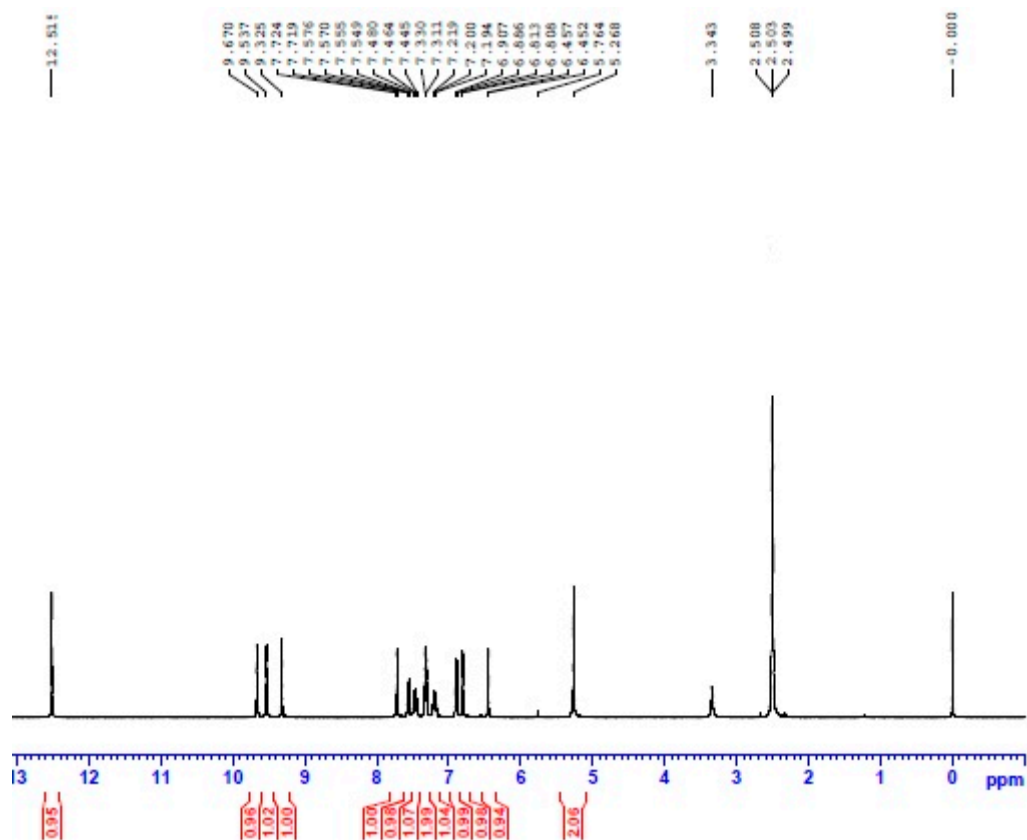

Figure S4. <sup>1</sup>H-NMR spectrum of **3h** (DMSO-*d*<sub>6</sub>).

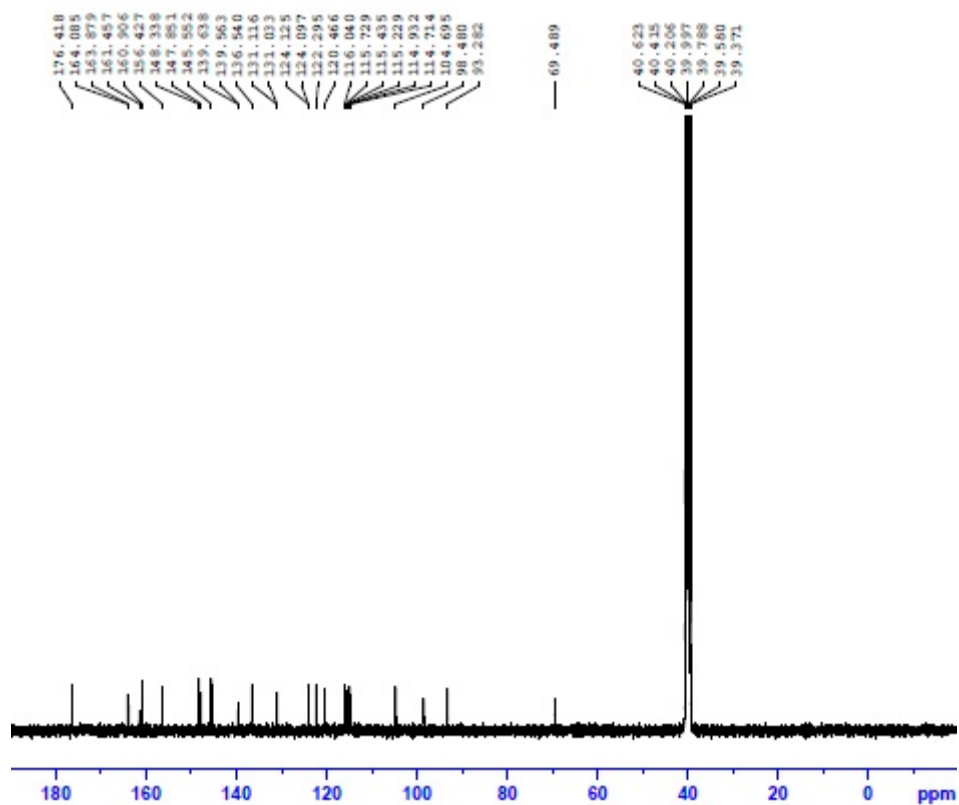

Figure S5. <sup>13</sup>C-NMR spectrum of **3h** (DMSO-*d*<sub>6</sub>).

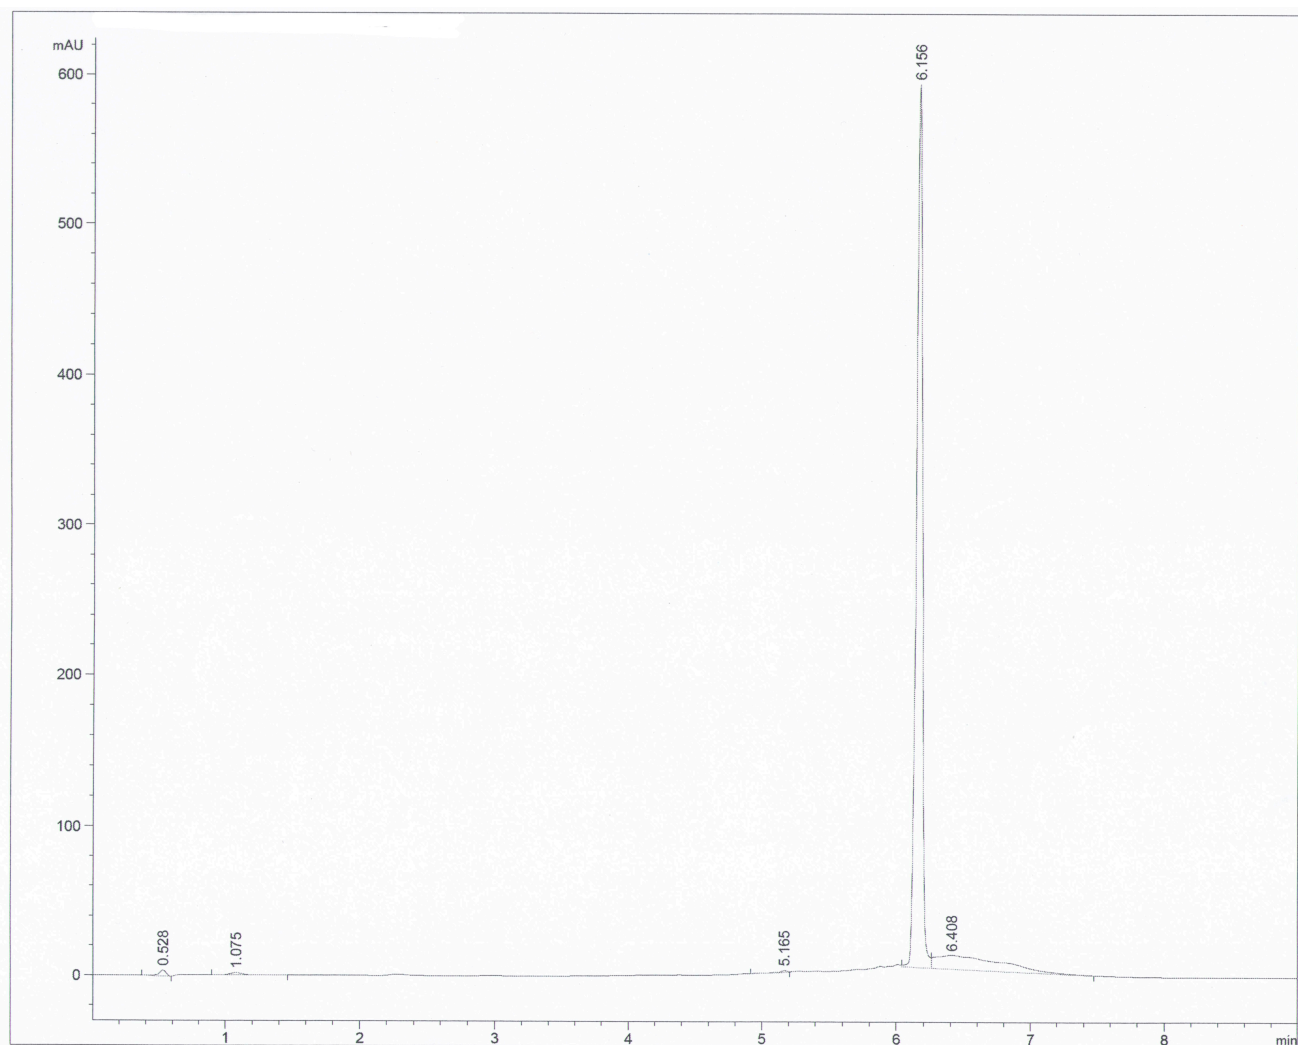

**Figure S6.** HPLC analysis of **3h**. Compound **3h** was analyzed by Agilent Technologies HPLC system and C18 reversed-phase HPLC column. Mobile phase consisted of a solvent mixture of methanol: 0.1% formic acid in the ratio 60:40 (v/v). The flow rate and test wavelength were 0.250 mL/min and 254 nm, respectively.

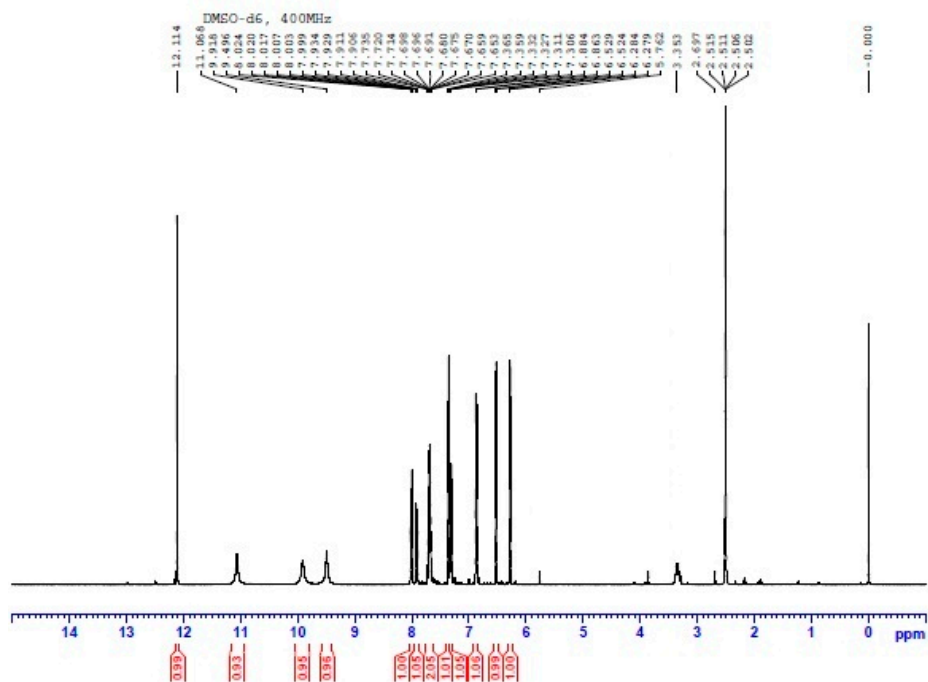

Figure 7.  $^1\text{H}$ -NMR spectrum of **4f** (DMSO- $d_6$ ).

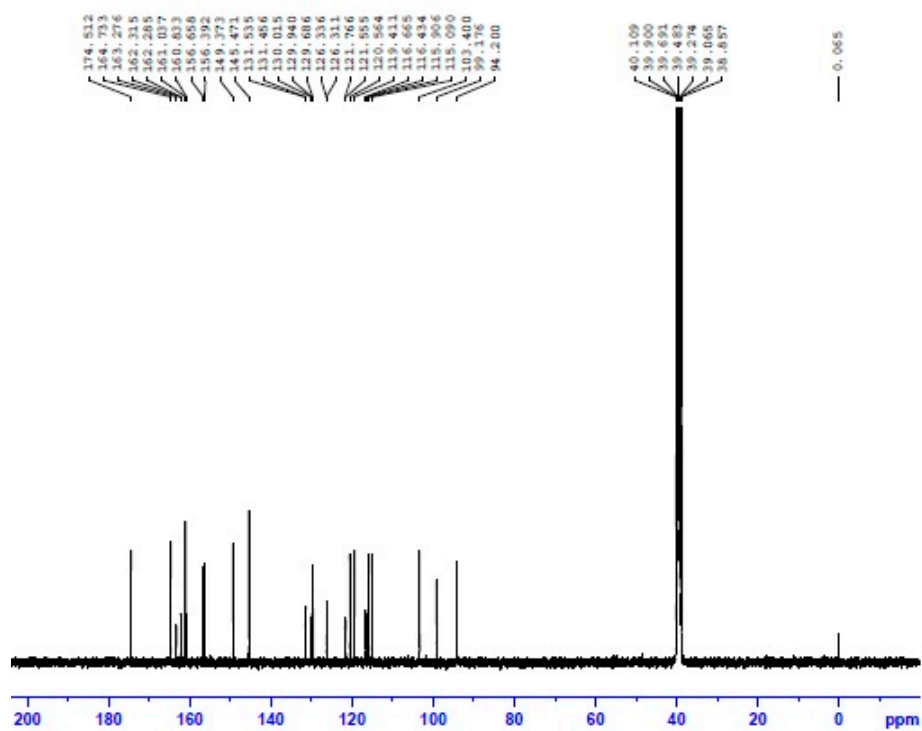

Figure S8.  $^{13}\text{C}$ -NMR spectrum of **4f** (DMSO- $d_6$ ).

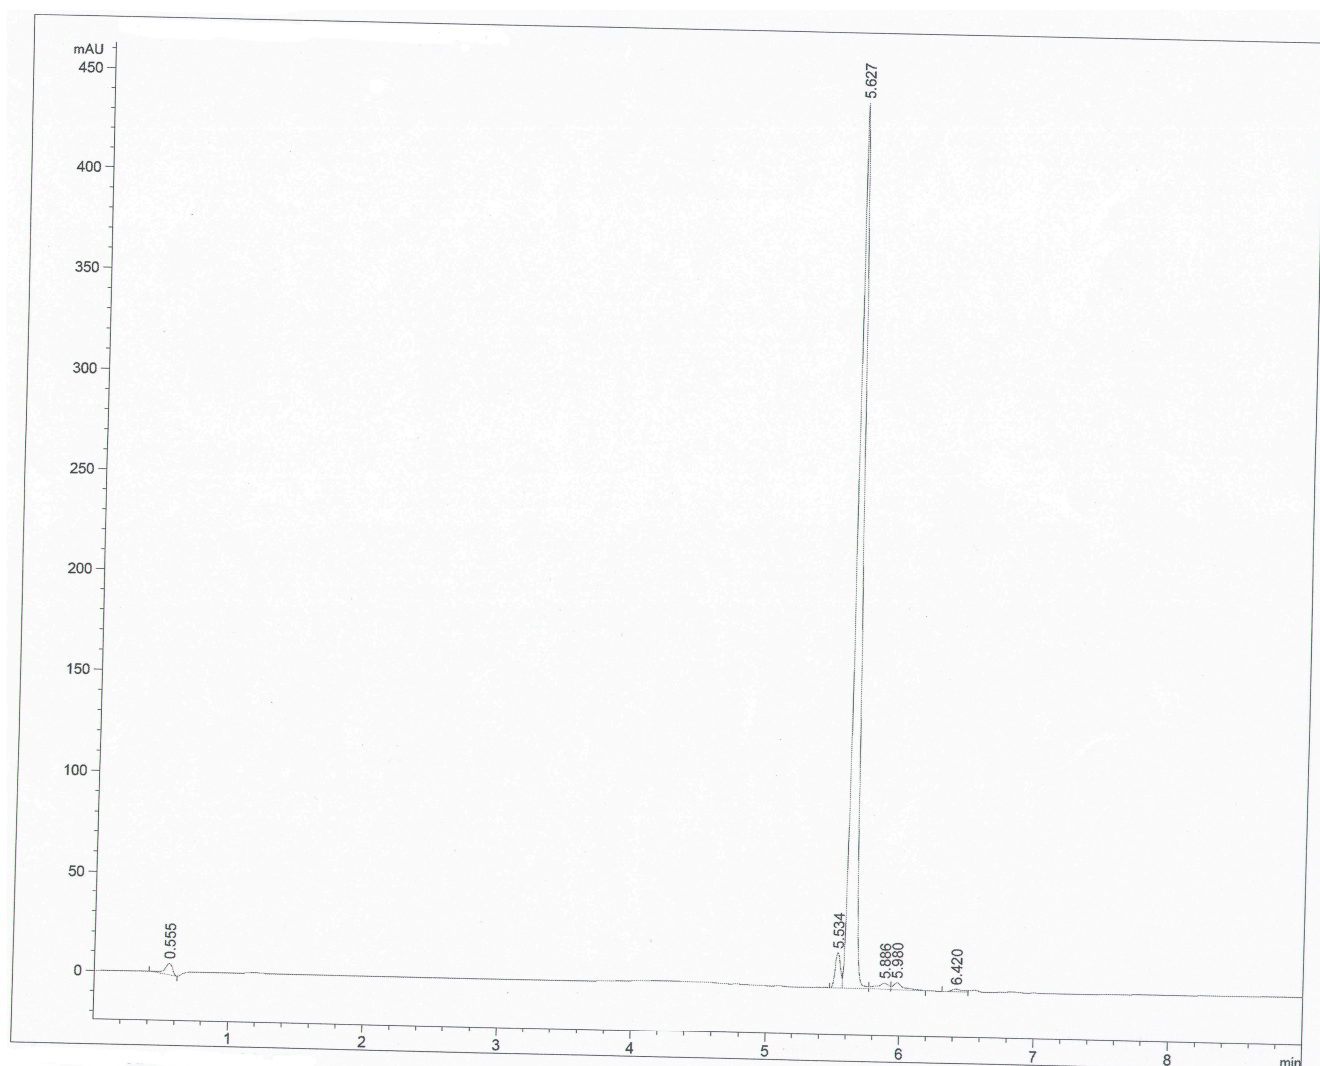

**Figure S9.** HPLC analysis of **4f**. Compound **4f** was analyzed by Agilent Technologies HPLC system and C18 reversed-phase HPLC column. Mobile phase consisted of a solvent mixture of methanol: 0.1% formic acid in the ratio 60:40 (v/v). The flow rate and test wavelength were 0.250 mL/min and 254 nm, respectively.

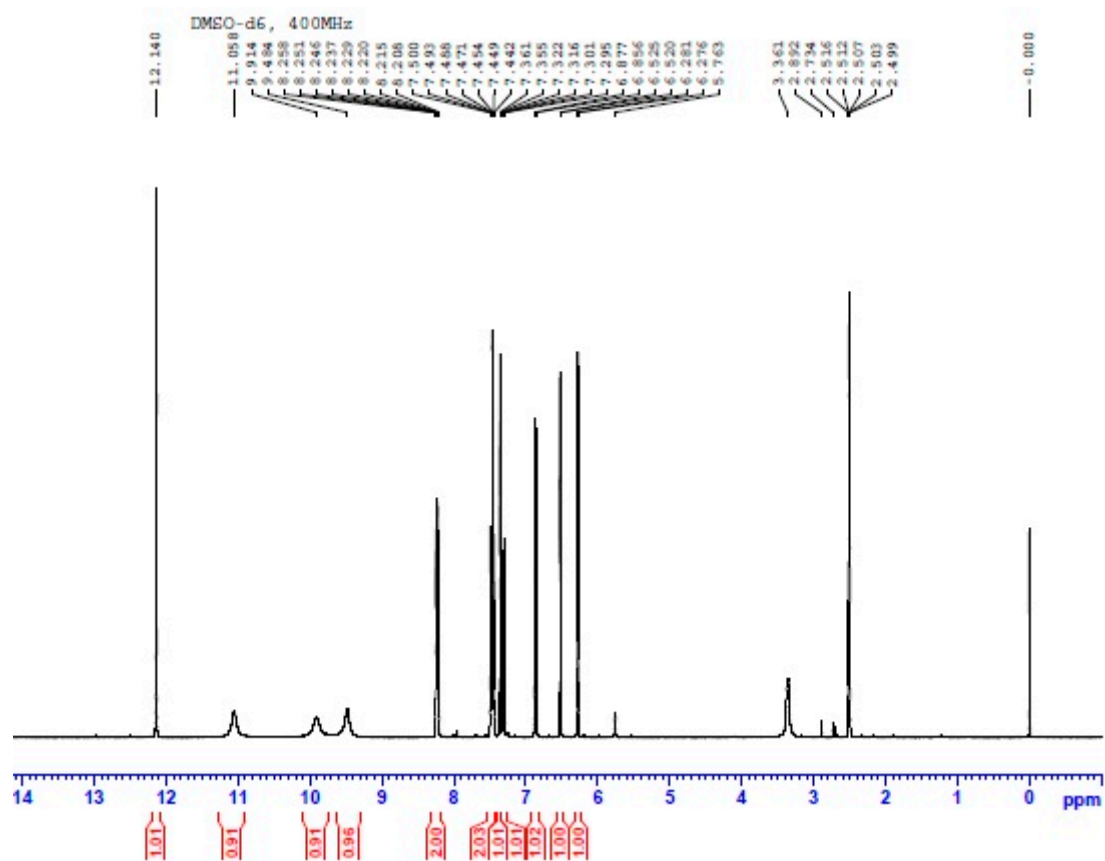

Figure S10.  $^1\text{H}$ -NMR spectrum of **4k** ( $\text{DMSO}-d_6$ ).

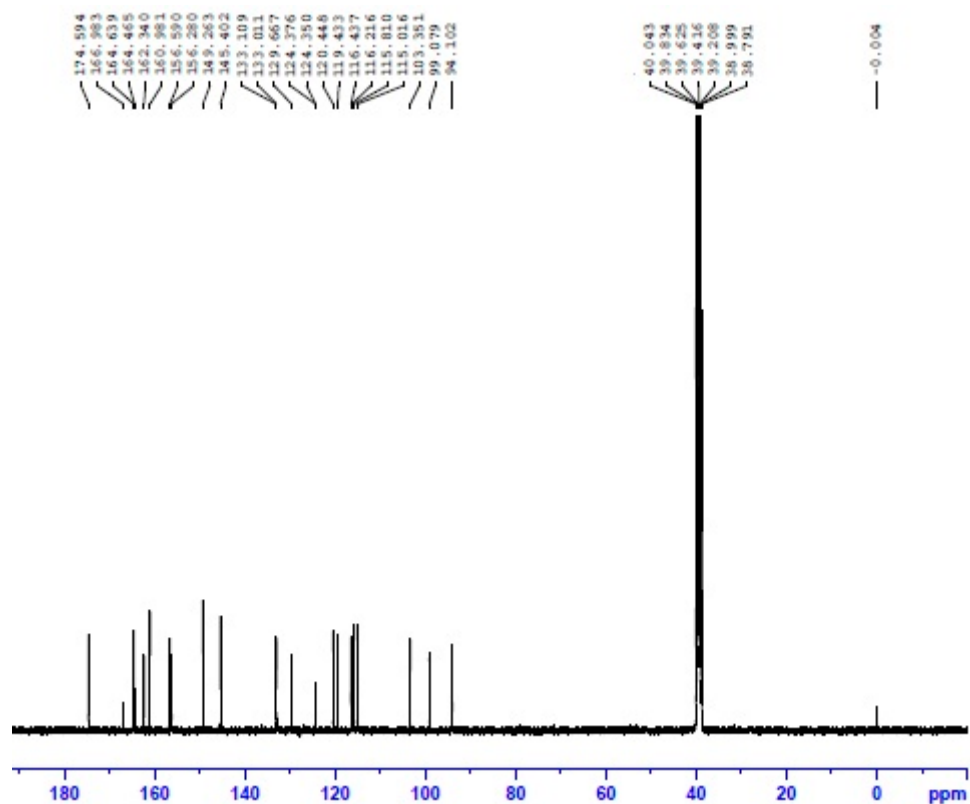

Figure S11.  $^{13}\text{C}$ -NMR spectrum of **4k** ( $\text{DMSO}-d_6$ ).

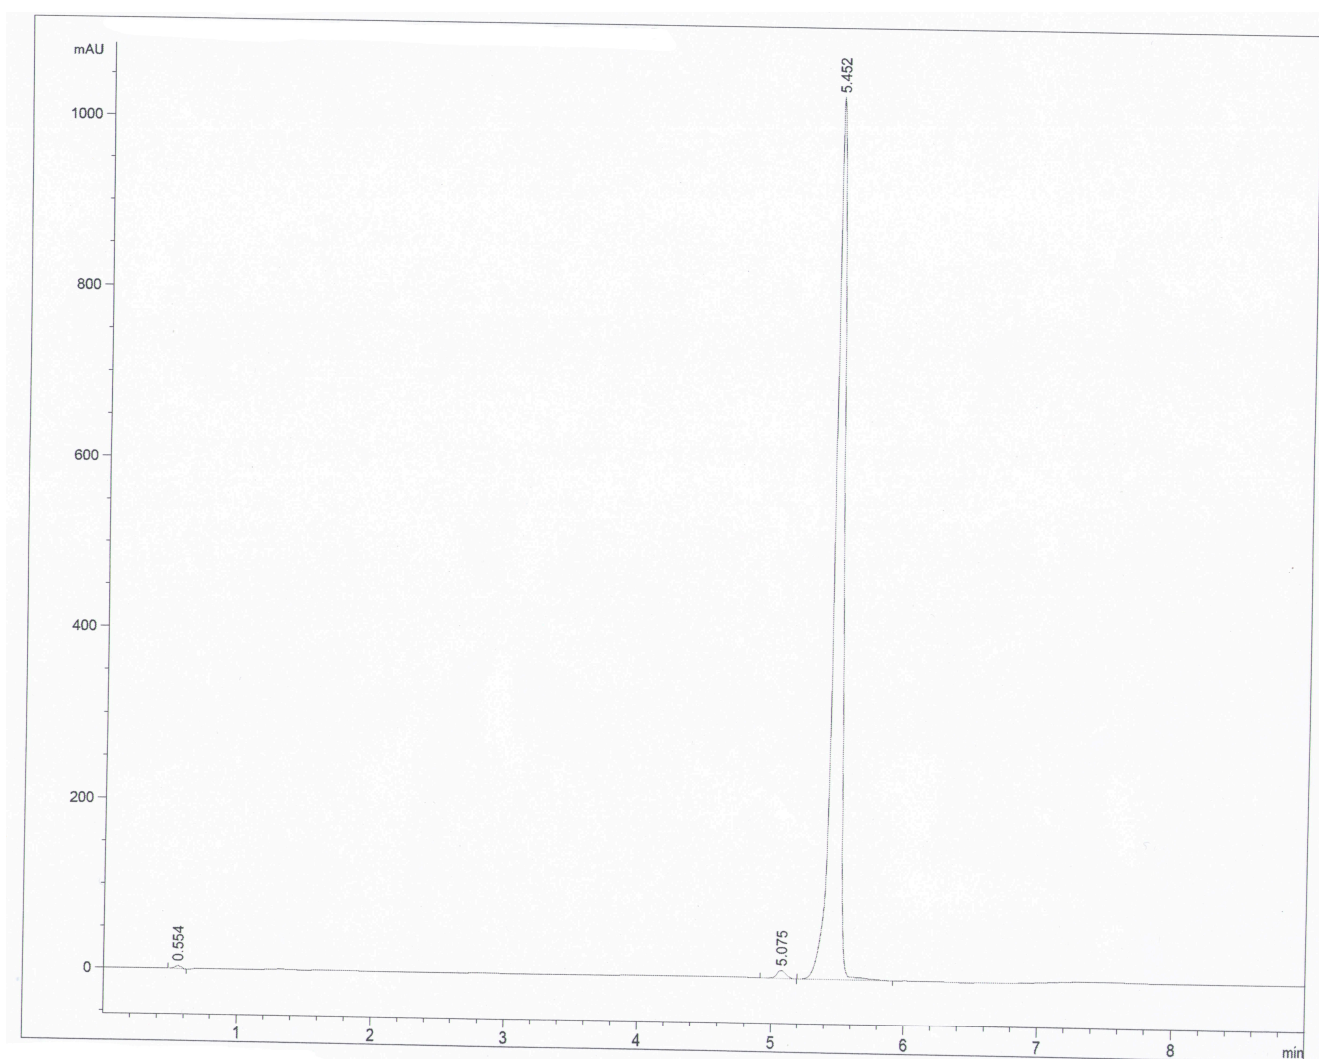

**Figure S12.** HPLC analysis of **4k**. Compound **4k** was analyzed by Agilent Technologies HPLC system and C18 reversed-phase HPLC column. Mobile phase consisted of a solvent mixture of methanol: 0.1% formic acid in the ratio 60:40 (v/v). The flow rate and test wavelength were 0.250 mL/min and 254 nm, respectively.
